# Supplementary material for: A modified seasonal cycle during MIS31 super-interglacial favors stronger interannual ENSO and monsoon variability
Source: Copernicus journal article supplement (doi:10.5194/cp-15-735-2019), 2019-04-10
Supplement: Supplementary file 1 [file cp-15-735-2019-supplement.pdf]

Supplement of *Clim. Past*, 15, 735–749, 2019  
<https://doi.org/10.5194/cp-15-735-2019-supplement>  
© Author(s) 2019. This work is distributed under  
the Creative Commons Attribution 4.0 License.

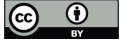

*Supplement of*

## **A modified seasonal cycle during MIS31 super-interglacial favors stronger interannual ENSO and monsoon variability**

**Flavio Justino et al.**

*Correspondence to:* Flavio Justino (fjustino@ufv.br)

The copyright of individual parts of the supplement might differ from the CC BY 4.0 License.

5

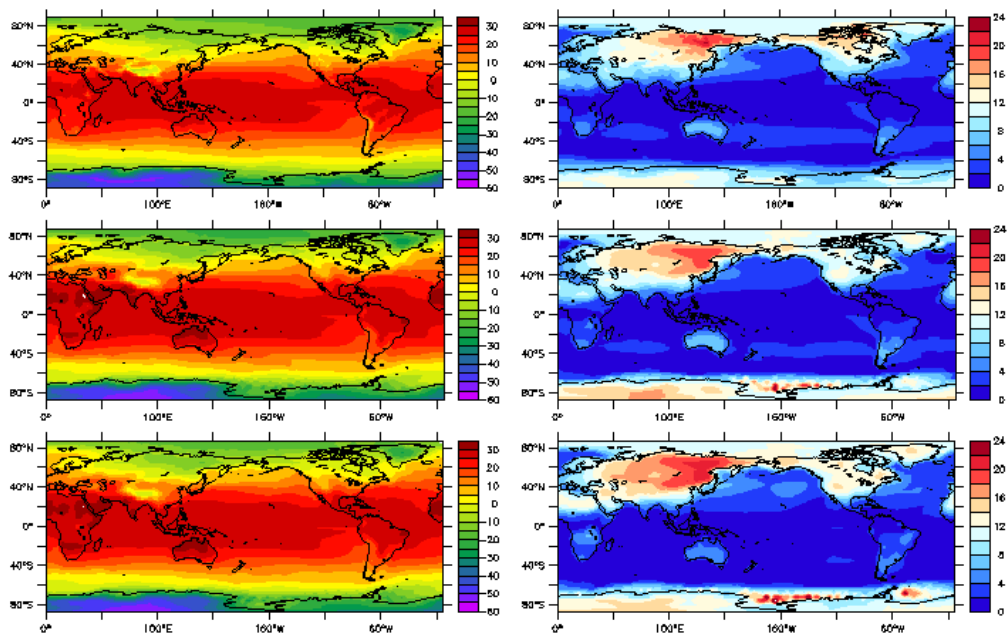

10

Figure S1 Time averaged surface temperature for ERAI (top right), the CTR (middle right) and the MIS31 simulation (bottom right). Top, middle and bottom (left) are the standard deviation delivered by the datasets.

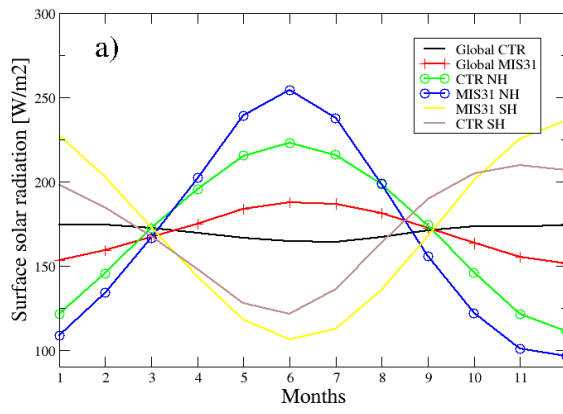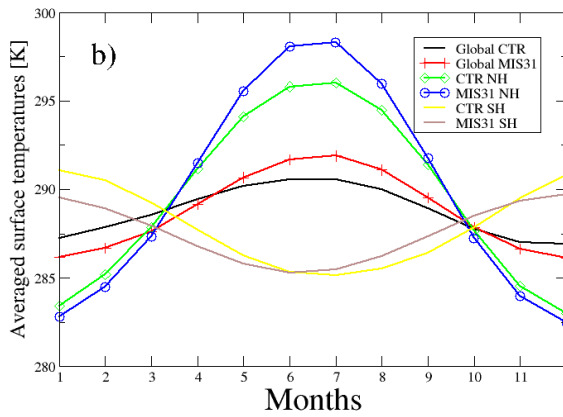

15

Figure S2 a) Zonally averaged surface solar radiation for the MIS31 and CTR simulations. b) The same as in a) but for surface temperatures.

20

25

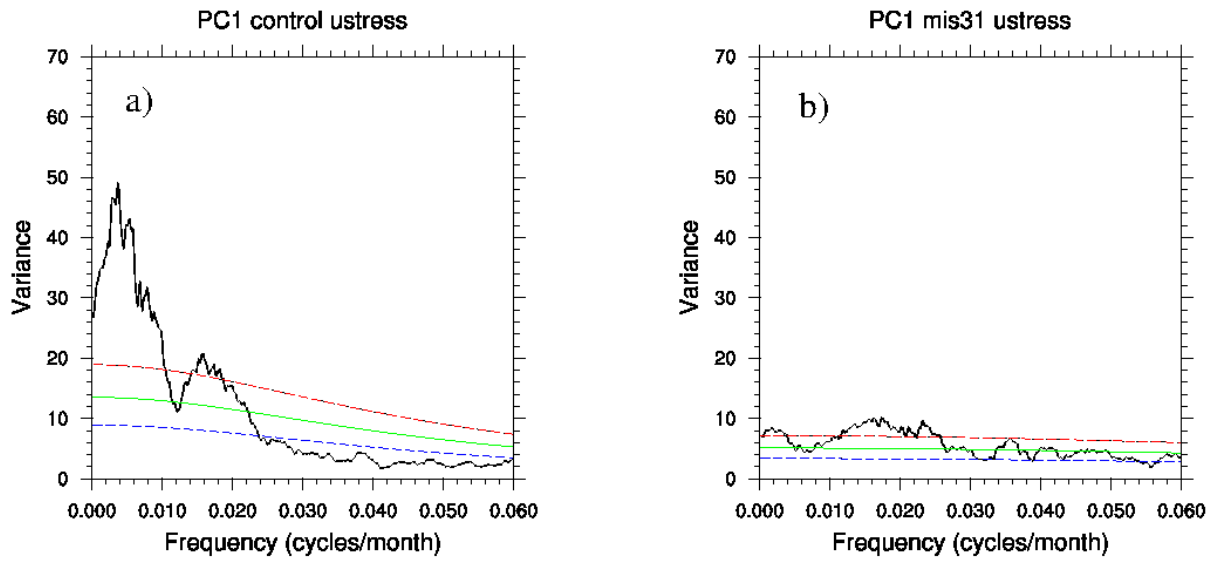

Figure S3. (a) MTM power spectrum of windstress between 0-20N for the CTR simulation and b) is the same but for the MIS31 simulation. Red, green and blue lines show the 90%, 95% and 99% significance levels.
